# Supplementary material for: Visual experience drives sleep need in Drosophila
Source: PubMed Central journal article supplement — Sleep. 2019 Apr 23;42(7):zsz102. doi: 10.1093/sleep/zsz102 (PMC6612675; doi:10.1093/sleep/zsz102), 2019-04-23
Supplement: zsz102_suppl_supplementary_figure_s2.pdf [file zsz102_suppl_supplementary_figure_s2.pdf]

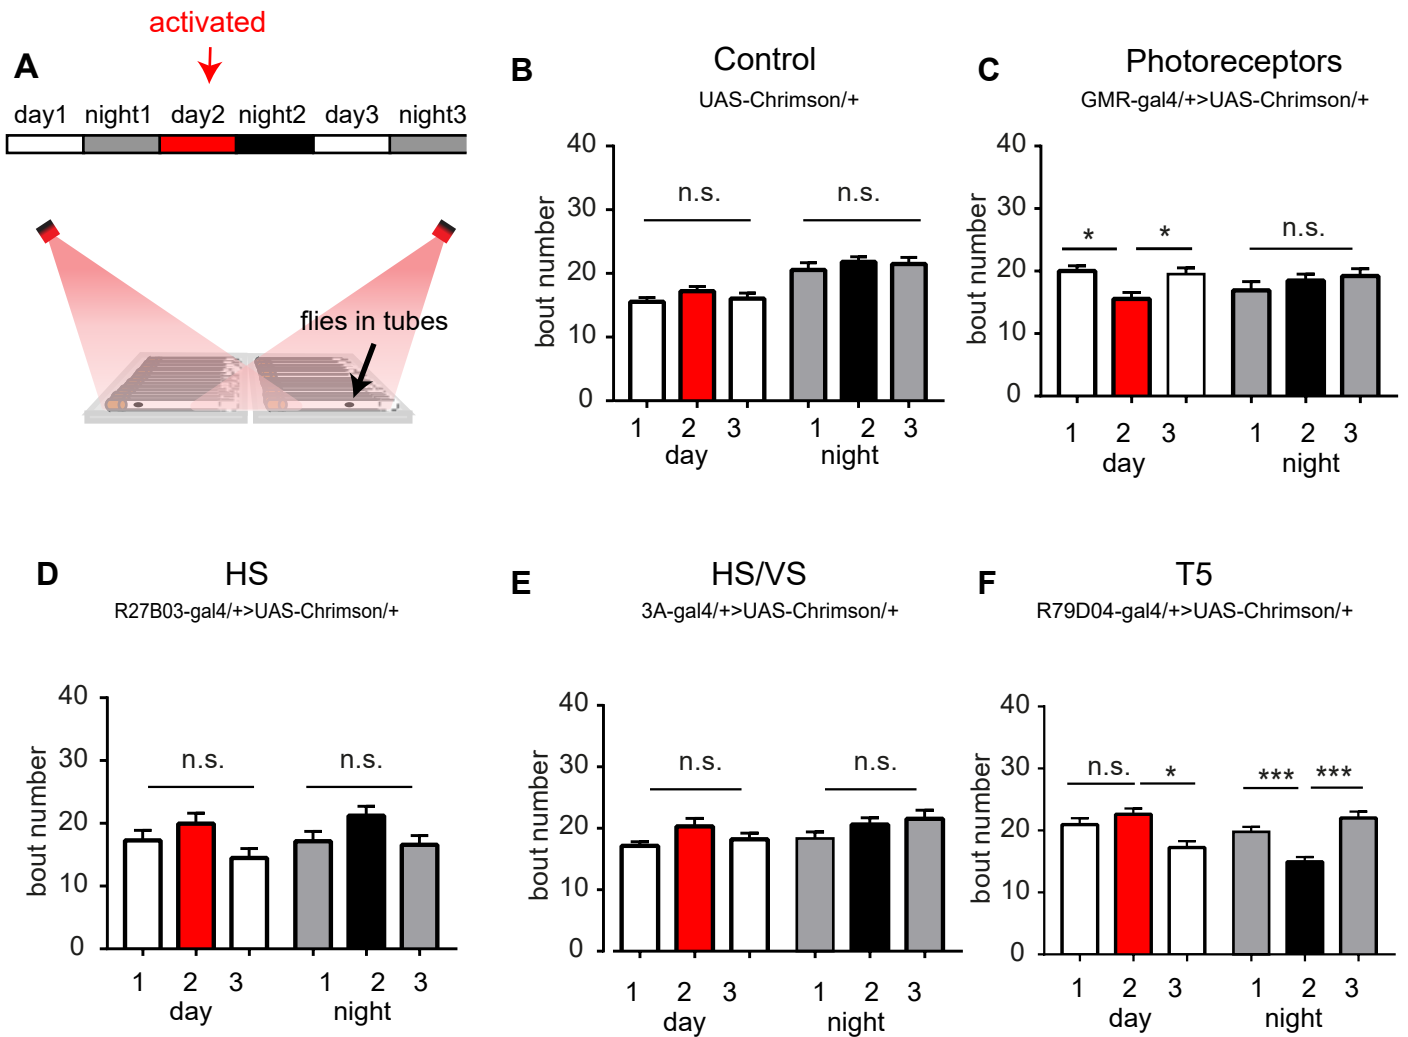

**Figure S2. Effects of activating different visual circuits on sleep bout number (Related to Figure 3).** A) Diagram of set up (as in Figure 3A). Quantification of day and night sleep bout number across baseline, red-light and recovery conditions in control UAS-Chrimson/+ flies (B) and flies expressing red-light activated channelrhodopsin (Chrimson) in photoreceptors in the retina (C), HS and VS neurons in the lobula plate (D,E), or T5 neurons of lobula complex (F).  $n = 31$  flies in (B), 33 flies in (C), 33 flies in (D) and 30 flies in (E) and 47 flies in (F). Comparisons between groups was performed using one-way ANOVA with Tukey's multiple comparisons.
