# Supplementary material for: Visual experience drives sleep need in Drosophila
Source: PubMed Central journal article supplement — Sleep. 2019 Apr 23;42(7):zsz102. doi: 10.1093/sleep/zsz102 (PMC6612675; doi:10.1093/sleep/zsz102), 2019-04-23
Supplement: zsz102_suppl_supplementary_figure_s3.pdf [file zsz102_suppl_supplementary_figure_s3.pdf]

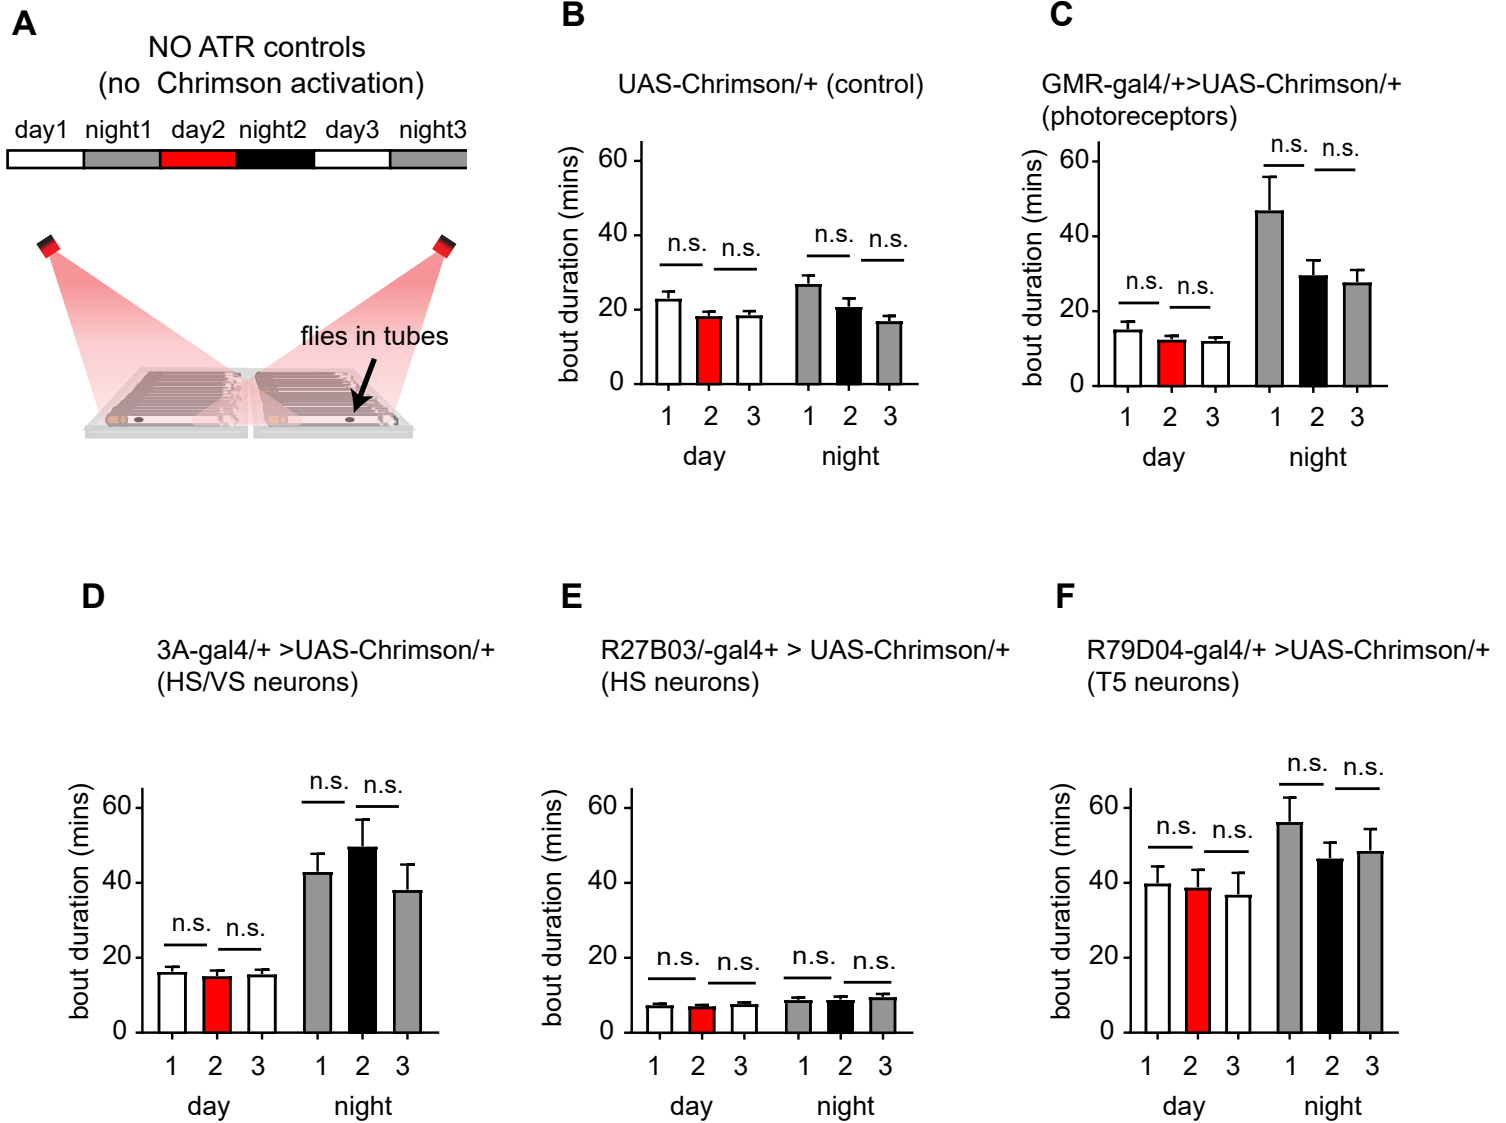

**Figure S3. Activating visual circuits has no effect on sleep bout duration in NO-ATR controls (related to Figure 4).** A) Diagram of set up (as in Figure 4A). B-F) Mean sleep bout duration was quantified across the day and the night in UAS-Chrimson/+ (genetic control), GMR-gal4/+>UAS-Chrimson/+ (flies expressing Chrimson in photoreceptors), 3A-gal4 > UAS-GFP (HS and VS neurons), R27B03-gal4>UAS-GFP (HS cells), and R79D04/+>UAS-GFP (T5 neurons). Sleep bout duration on the activation day (day 2) was not significantly different from sleep bout duration on baseline or recovery days (day 1 and day3). Additionally, sleep bout duration following activation (night 2) was not significantly different from baseline or recovery nights (night 1 and night 2). N = 33 flies in (B, D, E), 26 flies in (C), and 23 flies in (F). Error bars indicate the s.e.m. Comparisons between groups was performed using one-way ANOVA with Tukey's multiple comparisons.
