# Supplementary material for: Visual experience drives sleep need in Drosophila
Source: PubMed Central journal article supplement — Sleep. 2019 Apr 23;42(7):zsz102. doi: 10.1093/sleep/zsz102 (PMC6612675; doi:10.1093/sleep/zsz102), 2019-04-23
Supplement: zsz102_suppl_supplementary_figure_s4.pdf [file zsz102_suppl_supplementary_figure_s4.pdf]

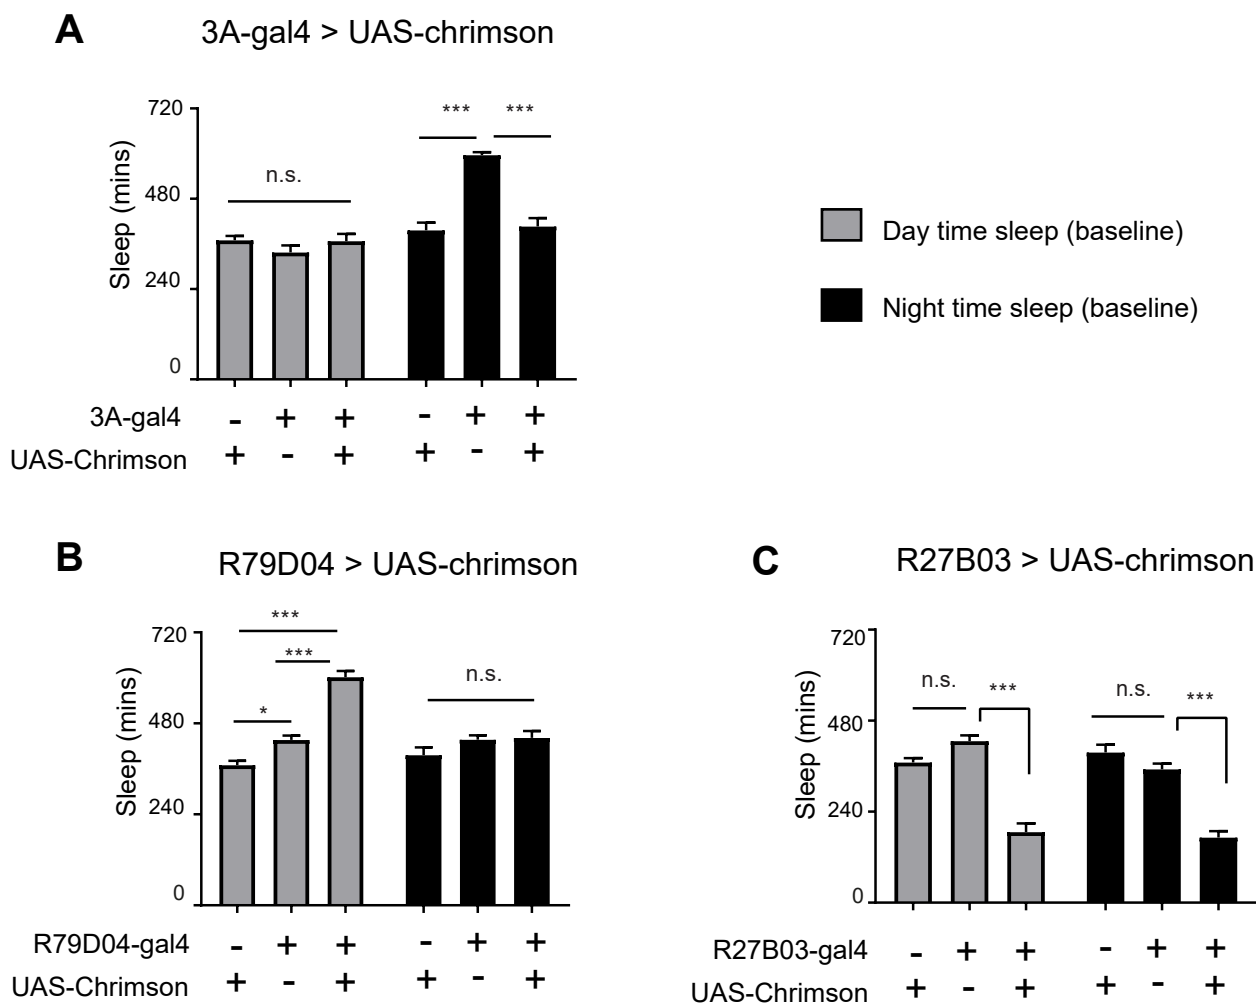

**Figure S4. Sleep levels in different genetic backgrounds (related to Figure 3).** Sleep duration for Chrimson expressed in the 3A-gal4 circuit (A), R79D04 circuit (B) and R27B03 circuit (C), in flies under baseline (no red light) conditions, on ATR. Gal-4/+ baseline sleep data is shown alongside UAS-Chrimson/+ and UAS-gal4>Chrimson baseline sleep data from Figure 3. N>29 flies for each genotype. Error bars show the s.e.m. One-way ANOVA with Tukey's multiple comparisons was used to compared sleep duration between genotypes across the day and night. \*p<0.05, \*\*\*p<0.001.
